# Supplementary material for: Preparation of fluorinated polyimides with low dielectric constants and low dielectric losses by combining ester groups and triphenyl pyridine structures
Source: Royal Society of Chemistry journal article supplement (doi:10.1039/d3py00970j), 2023-12-11
Supplement: d3py00970j1.pdf [file d3py00970j1.pdf]

# Preparation of Fluorinated Polyimides with Low Dielectric Constants, Low Dielectric Losses by Combining Ester Groups and Triphenyl pyridine Structures

Hong Li<sup>a</sup>, Feng Bao<sup>\*a</sup>, Shuanger Li<sup>a</sup>, Xiyang Li<sup>a</sup>, Yadong Li<sup>b</sup>, Kexin Mu<sup>a</sup>, Mingliang Wang<sup>a</sup>, Caizhen Zhu<sup>a</sup>, Jian Xu<sup>\*a</sup>

<sup>a</sup> Institute of Low-Dimensional Materials Genome Initiative, College of Chemistry and Environmental Engineering, Shenzhen University, Shenzhen, 518060, China.

<sup>b</sup> Chengdu Institute of Organic Chemistry, Chinese Academy of Sciences, Chengdu, 610041, P.R. China.

\* Corresponding Authors

*This supporting information is composed of a total of x pages, including y Figures.*

## 1.1. Materials

1,3-Dioxo-1,3-dihydroisobenzofuran-5-carbonyl chloride (>98%) was purchased from Shanghai Bide Pharmaceutical Technology Co., Ltd. Acetic acid (AR) and acetic anhydride (AR) were purchased from Shenzhen Changtai Chemical Technology Co., Ltd. Bisphenol A (>98%), N, N-dimethylacetamide (DMAC, AR), acetonitrile (99.9%, H<sub>2</sub>O <0.003%), pyridine were purchased from Shanghai Maclean Biochemical Technology Co., Ltd, where DMAC was treated by a solvent treatment system and used. Distilled water was homemade in the laboratory. All other unspecified drugs were purchased and used directly.

## 1.2. Measurements

The samples underwent rigorous NMR analysis involving nuclear magnetic resonance hydrogen spectroscopy (<sup>1</sup>H NMR) and nuclear magnetic resonance carbon spectroscopy (<sup>13</sup>C NMR). This assessment utilized an AVABCE III 500 MHz superconducting NMR spectrometer from Bruker in Switzerland. Internal standardization was achieved using tetramethylsilane (TMS), while DMSO-d<sub>6</sub> was the chosen solvent. The temperature for testing was maintained at 25 °C. A Q Exactive

Focus mass spectrometer was deployed for the mass spectrometry examination. The samples' Fourier Transform Infrared Spectroscopy (FTIR) evaluation was conducted using the Shimadzu IR Affinity-1 instrument, covering a spectral range from 4000  $\text{cm}^{-1}$  to 400  $\text{cm}^{-1}$ . The molecular weight information of the polymers was characterized by a 1260 Infinity II GPC from Agilent Technologies. This analysis employed DMF and 0.1% LiCl as the mobile phases, with a 1.0 mL/min flow rate and a testing temperature of 45°C. A MiniFlex600 X-ray polycrystalline powder diffractometer from Japan was used for the WAXD analysis, focusing on a test angle range of 5° to 80°. The UV-visible assessment was performed using the UV-3600PLUS UV-visible near-infrared spectrometer by Shimadzu in Japan. Dielectric testing utilized the P5004A vector network analyzer from YesterTech, with a pre-testing drying treatment at 100 °C for 12 hours. The films were characterized by a thickness of 50 to 70  $\mu\text{m}$ , and the test temperature was maintained at 25 °C. The contact angle test was carried out by the SDC-350 contact angle meter of Shengding Precision Instrument Company of Dongguan, and the sample was dried and processed at 100 °C for 5 h before the test. The thermals tests were conducted using METTLER TOLEDO's Mettler Differential Scanning Calorimeter (DSC3). The temperature range was 30-350 °C, and the temperature increase was 20 °C/min; the nitrogen gas flow rate was 50 ml/min. Determining thermal decomposition characteristics employed the Mettler Toledo Mettler TGA2 Thermogravimetric Analyzer. The tests encompassed a temperature range of 30 °C to 800 °C, with a temperature increase rate of 10 °C/min. Nitrogen and airflow were maintained at speeds of 50 ml/min. Mechanical properties were assessed using a Zwick tension machine with a 1 mm/min tension rate. The samples measured 20 mm  $\times$  6 mm, and the film thickness ranged from 50 to 70  $\mu\text{m}$ . For the water absorption test, three sample films sized 50 mm  $\times$  50 mm underwent a vacuum oven drying at 120°C for 12 hours to establish mass  $W_1$ . Then the samples were submerged in distilled water for 24 hours, excess liquid was removed with a paper towel, and mass  $W_2$  was measured. The resulting water absorption rate was calculated as  $(W_2 - W_1) / W_1 \times 100$ , and an average value was derived from three test repetitions.

**Page S2:**

Figure S1. (a)  $^1\text{H}$  NMR spectra of BTPDA in  $\text{DMSO-d}_6$ , (b)  $^{13}\text{C}$  NMR spectra of BTPDA in  $\text{DMSO-d}_6$ , (c) FTIR spectra of BTPDA

Figure S2. MS spectrum of BTPDA in DMF

Figure S3.  $^1\text{H}$  NMR spectra of PAAs in  $\text{DMSO-d}_6$

Figure S4. Dielectric properties of PI films under humid conditions

Figure S5. (a) GPC Date of PI-EH-PAA; (b) GPC Date of PI-ECF<sub>3</sub>-PAA;(c) GPC Date of PI-E2CF<sub>3</sub>-PAA

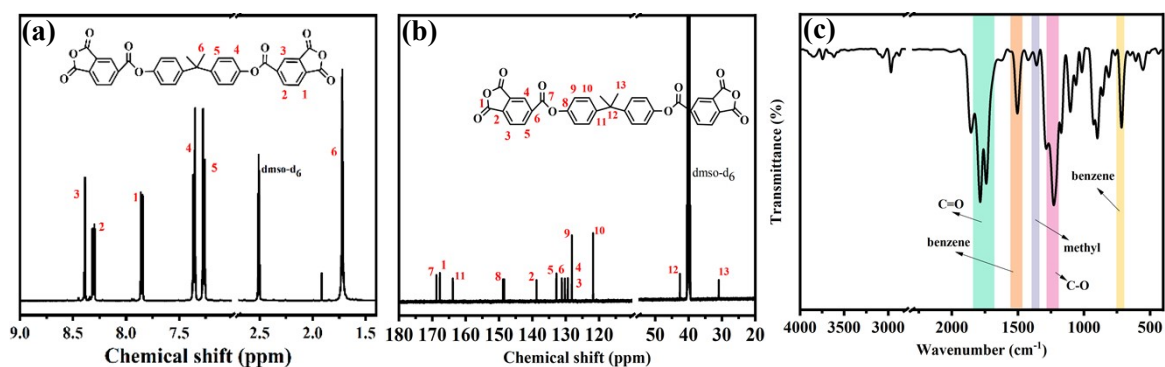

**Figure S1.** (a)  $^1\text{H}$  NMR spectra of BTPDA in  $\text{DMSO-d}_6$ , (b)  $^{13}\text{C}$  NMR spectra of BTPDA in  $\text{DMSO-d}_6$ , (c) FTIR spectra of BTPDA

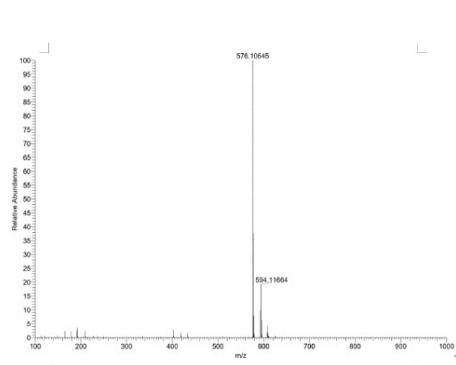

**Figure S2.** MS spectrum of BTPDA in DMF

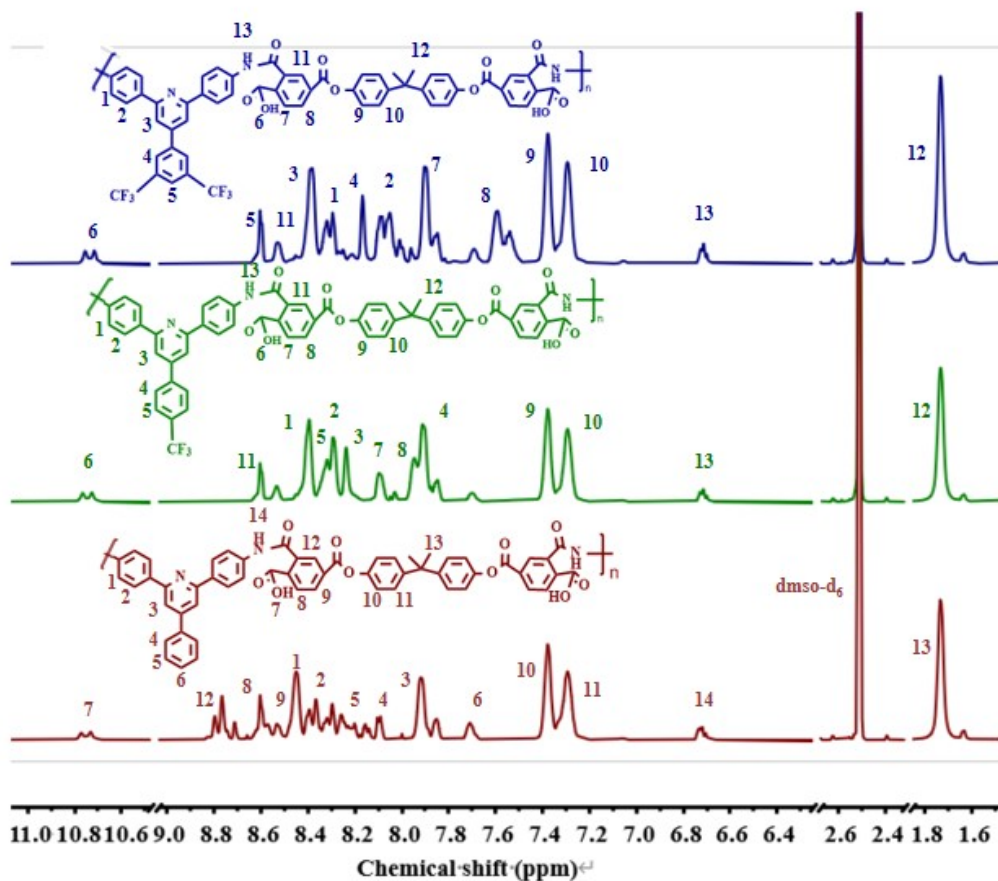

Figure S3.  $^1\text{H}$  NMR spectra of PAAs in  $\text{DMSO-d}_6$

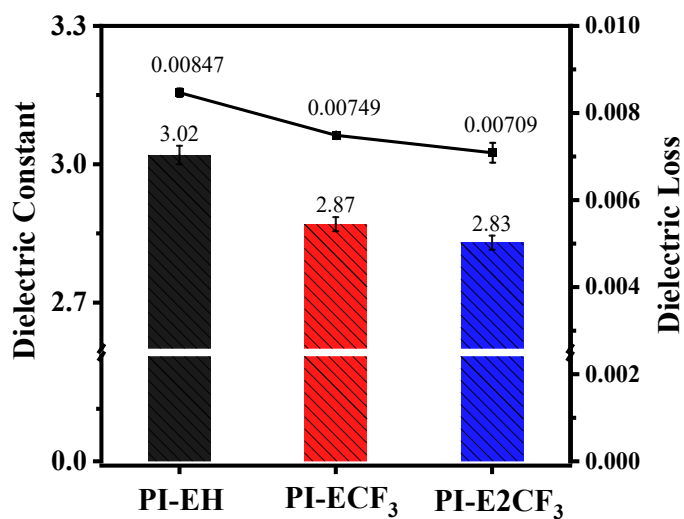

Figure S4. Dielectric properties of PI films under humid conditions

(a)

### Results

Analysed by  
Comments

GPC at 21:15:30 on 2023年9月20日

#### Key Results

|              | Bulk MW (g/mol) | Mw (g/mol) | Mn (g/mol) | PD    | Rgw (nm) | Rg Intercept | Rg Slope | Rhw (nm) |
|--------------|-----------------|------------|------------|-------|----------|--------------|----------|----------|
| Peak 1       | 113363          | 98583      | 38893      | 2.535 | 0.00     | NaN          | NaN      | 10.11    |
| Rh Intercept | -1.381          | Rh Slope   | 0.4779     |       |          |              |          |          |

(b)

### Results

Analysed by  
Comments

GPC at 21:00:32 on 2023年9月20日

#### Key Results

|              | Bulk MW (g/mol) | Mw (g/mol) | Mn (g/mol) | PD    | Rgw (nm) | Rg Intercept | Rg Slope | Rhw (nm) |
|--------------|-----------------|------------|------------|-------|----------|--------------|----------|----------|
| Peak 1       | 63358           | 63645      | 29182      | 2.181 | 0.00     | NaN          | NaN      | 8.49     |
| Rh Intercept | -1.342          | Rh Slope   | 0.4728     |       |          |              |          |          |

(c)

### Results

Analysed by  
Comments

GPC at 21:13:21 on 2023年9月20日

#### Key Results

|              | Bulk MW (g/mol) | Mw (g/mol) | Mn (g/mol) | PD    | Rgw (nm) | Rg Intercept | Rg Slope | Rhw (nm) |
|--------------|-----------------|------------|------------|-------|----------|--------------|----------|----------|
| Peak 1       | 69233           | 69844      | 32352      | 2.159 | 0.01     | 16.2         | -3.734   | 9.30     |
| Rh Intercept | -1.295          | Rh Slope   | 0.4673     |       |          |              |          |          |

**Figure S5.** (a) GPC Date of PI-EH-PAA; (b) GPC Date of PI-ECF<sub>3</sub>-PAA;(c) GPC Date of PI-E2CF<sub>3</sub>-PAA
